# Supplementary material for: MnASI1 Mediates Resistance to Botrytis cinerea in Mulberry (Morus notabilis)
Source: MDPI journal article supplement (doi:10.3390/ijms232113372), 2022-11-02
Supplement: s1 [file s1]

Table S2. Primers for real-time PCR.

| Gene symbol    | Forward primer        | Reverse primer        |
|----------------|-----------------------|-----------------------|
| <i>MnASI1</i>  | GCTCGTGCCCGTTCTATGT   | TCCCGTCCCAATCAATCTG   |
| <i>MnASI2</i>  | ACGGCTCGTGTCTTTCTA    | GTATCTCAGGTCGTCTCCC   |
| <i>MnASI3</i>  | ACGACCCGTGCCCCTCTAC   | CCGCCAACCTTTGTCCATT   |
| <i>MnASI4</i>  | TGAGGGAGACGAGGGACT    | CTACAACCAGGGCAAGCA    |
| <i>MnASI5</i>  | GATGGCGAACTTATCAGCACC | AACTTGCCCACATCTGAACCA |
| <i>MnASI6</i>  | GGGAGACGAGGGACTTCAA   | GAGCAGCCCAGACCAACAA   |
| <i>MnActin</i> | GCATGAAGATCAAGGTGGTG  | CATCTGCTGGAAGGTGCTAA  |
| <i>AtPR1</i>   | GCAGAACAACTAAGAGGCAA  | CAGCGTAGTTGTAGTTAGCC  |
| <i>AtActin</i> | TGCTGAGCTTATCGATTCCG  | TTCGGTGATGGGAATACAG   |
