# Supplementary material for: MnASI1 Mediates Resistance to Botrytis cinerea in Mulberry (Morus notabilis)
Source: MDPI journal article supplement (doi:10.3390/ijms232113372), 2022-11-02
Supplement: s1 [file s1]

Table S1. Differential expression analysis of *MnASI* gene in Mock and Inoculated.

| Gene ID       | Inoculated FPKM | Mock FPKM | log2(Inoculated/Mock) |
|---------------|-----------------|-----------|-----------------------|
| <i>MnASI1</i> | 6310.57         | 66.92     | 6.556122              |
| <i>MnASI2</i> | 2341.096        | 3.676     | 9.299648              |
| <i>MnASI3</i> | 1939.94         | 487.78    | 1.988951              |
| <i>MnASI4</i> | 601.136         | 79.293    | 2.909071              |
| <i>MnASI5</i> | 7591.113        | 4709.027  | 0.688883              |
| <i>MnASI6</i> | 2.46            | 0         | 6.714959              |
